# Supplementary material for: SCFFbxw5 targets kinesin‐13 proteins to facilitate ciliogenesis
Source: PubMed Central journal article supplement (PMC8441365; doi:10.15252/embj.2021107735), 2021-08-09

Source data for Figure 1 (whole scans of blots)

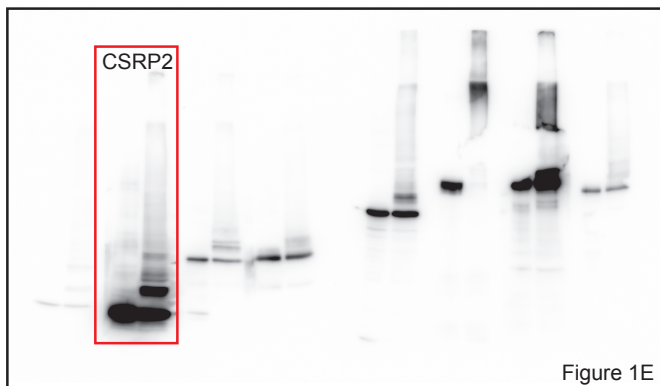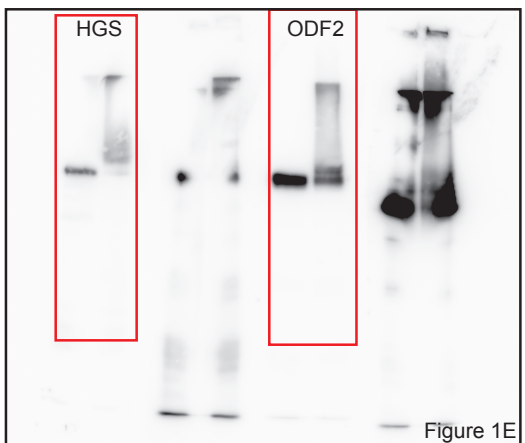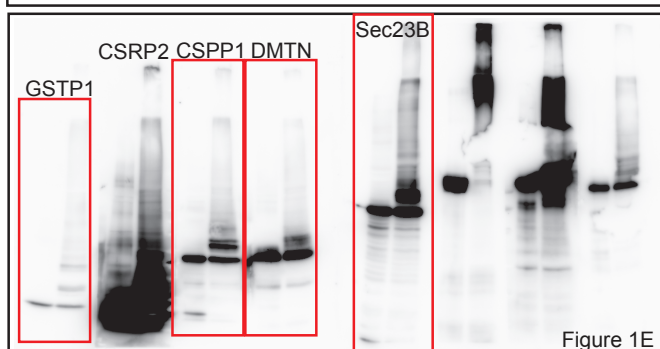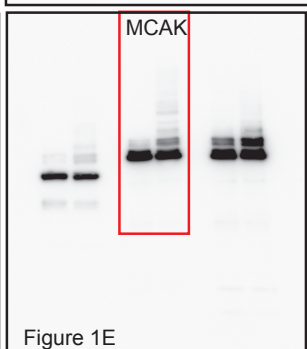

Supplement: EMBJ-40-e107735-s008.pdf [file EMBJ-40-e107735-s008.pdf]
