# Supplementary material for: SCFFbxw5 targets kinesin‐13 proteins to facilitate ciliogenesis
Source: EMBO J. 2021 Aug 9;40(18):e107735. doi: 10.15252/embj.2021107735 (PMC8441365; doi:10.15252/embj.2021107735)
Supplement: Supplementary file 2 — Appendix [file EMBJ-40-e107735-s001.pdf]

**Appendix file – Schweiggert *et al.***

**Table of Contents**

**Appendix Table S1: Plasmids.....2**

**Appendix Table S2: Reagents.....6**

**Appendix Table S1: Plasmids.**

| Plasmid                              | Template for PCR/Method             | Oligonucleotides                                                                                               | Source                 |
|--------------------------------------|-------------------------------------|----------------------------------------------------------------------------------------------------------------|------------------------|
| pET22B-Uba1-His                      |                                     |                                                                                                                | <sup>24</sup>          |
| pGEX6P3-GST-Cdc34                    |                                     |                                                                                                                | <sup>24</sup>          |
| pGEX6P3-GST-UbcH5b                   |                                     |                                                                                                                | <sup>24</sup>          |
| pGEX6P3-GST-UbcH5c                   |                                     |                                                                                                                | A. Pichler             |
| pGEX6P3-GST-Ube2G1                   | cDNA of RPE-1 cells (Gibson)        | 5'-CCTGGGATCCCCGAATTCCATGACGGAGCTGCAGTC-3'<br>5'-TGCGGCCGCTCGAGTCGACTCACTCAAAAGCAGTCTCTTGG-3'                  | This work              |
| pGEX-GST-Nedd8                       |                                     |                                                                                                                | B. Schulman            |
| pGEX-GST-Ubc12                       |                                     |                                                                                                                | B. Schulman            |
| pGEX-GST-APPBP1-rbs-Uba3             |                                     |                                                                                                                | B. Schulman            |
| pGEX-4T-GST-PreScission              |                                     |                                                                                                                | A. Dickmanns           |
| pET28a-His-Ubiquitin                 |                                     |                                                                                                                | <sup>24</sup>          |
| pET3a-Ubiquitin                      |                                     |                                                                                                                | S. Raasi <sup>69</sup> |
| pET3a-Ubiquitin(K48R)                | pET3a-Ubiquitin (mutagenesis)       | 5'-TTGATCTTTGCCGGTA <sub>g</sub> GCAGCTCGAGGACGGTA-3'<br>5'-TACCGTCCTCGAGCTGC <sub>c</sub> TACCGGCAAAGATCAA-3' | This work              |
| pET3a-Ubiquitin(K63R)                | pET3a-Ubiquitin                     |                                                                                                                | S. Raasi <sup>69</sup> |
| pET3a-Ubiquitin(K48R/K63R)           | pET3a-Ubiquitin(K63R) (mutagenesis) | 5'-TTGATCTTTGCCGGTA <sub>g</sub> GCAGCTCGAGGACGGTA-3'<br>5'-TACCGTCCTCGAGCTGC <sub>c</sub> TACCGGCAAAGATCAA-3' | This work              |
| pENTR221-GSTP1 (clone ID 182399431)  |                                     |                                                                                                                | DKFZ ORF Collection    |
| pENTR221-CSRP2 (clone ID 176815824)  |                                     |                                                                                                                | DKFZ ORF Collection    |
| pENTR221-Sec23B (clone ID 128836251) |                                     |                                                                                                                | DKFZ ORF Collection    |
| pENTR221-HGS (clone ID 158422822)    |                                     |                                                                                                                | DKFZ ORF Collection    |
| pENTR223-CSPP1 (clone ID 148371129)  |                                     |                                                                                                                | DKFZ ORF Collection    |
| pENTR221-ODF2 (clone ID: 142932633)  |                                     |                                                                                                                | DKFZ ORF Collection    |

|                                        |                                   |                                                                               |                           |
|----------------------------------------|-----------------------------------|-------------------------------------------------------------------------------|---------------------------|
| pENTR221-Kif2C<br>(clone ID 199650980) |                                   |                                                                               | DKFZ ORF<br>Collection    |
| pENTR221-Kif2A<br>(clone ID 140305080) |                                   |                                                                               | DKFZ ORF<br>Collection    |
| pENTR223-Kif2B<br>(clone ID 123156095) |                                   |                                                                               | DKFZ ORF<br>Collection    |
| pcDNA3.1-HA-GSTP1                      | pENTR221-GSTP1<br>(XhoI/KpnI)     | 5'-CGGCTCGAGATGCCGCCCTACACCGTG-3'<br>5'-CGGGGTACCCTACTGTTTCCCGTTGCC-3'        | This work                 |
| pcDNA3.1-HA-CSRP2                      | pENTR221-CSRP2<br>(XhoI/KpnI)     | 5'-CGGCTCGAGATGCCTGTCTGGGGAGGTG-3'<br>5'-CGGGGTACCTTACTGGGCATGAACAAGAGC-3'    | This work                 |
| pcDNA3.1-HA-Sec23b                     | pENTR221-Sec23B<br>(XhoI/KpnI)    | 5'-CGGCTCGAGATGGCGACATACCTGGAG-3'<br>5'-CGCGGTACCTTAACAGGCACTGGAGACAGC-3'     | This work                 |
| pcDNA3.1-HA-HGS                        | pENTR221-HGS<br>(XhoI/KpnI)       | 5'-CGGCTCGAGATGGGGCGAGGCAGCGGC-3'<br>5'-CGGGGTACCTCAGTCGAATGAAATGAGCTG-3'     | This work                 |
| pcDNA3.1-HA-CSPP1                      | pENTR223-CSPP1<br>(XhoI/HindIII)  | 5'-CGGCTCGAGATGAGACAGCCTTCTCCTATAG-3'<br>5'-CGGAAGCTTTTAACCATGTGCAGTCGACAG-3' | This work                 |
| pcGS5-HA-DMTN                          |                                   |                                                                               | P. Sauer                  |
| pcDNA3.1-HA-ODF2                       | pENTR221-ODF2<br>(BamHI/XbaI)     | 5'-CGGGGATCCATGAAGGACCGCTCTTCAACTC-3'<br>5'-CGGTCTAGATCAGGCAGGAGAGATCGGGAG-3' | This work                 |
| pcDNA3.1-HA-MCAK                       | pENTR221-Kif2C<br>(BamHI/NotI)    | 5'-ATATGGATCCATGGCCATGGACTCGTCG-3'<br>5'-TATAGCGGCCGCCTACTGGGGCCGTTTCTTG-3'   | This work                 |
| pcDNA3.1-HA-Kif2A                      | pENTR221-Kif2A<br>(BamHI/NotI)    | 5'-TATAGGATCCATGGTAACATCTTTAAATG-3'<br>5'-TATAGCGGCCGCTTAAAGGGCACGGGGTC-3'    | This work                 |
| pcDNA3.1-HA-Kif2B                      | pENTR223-Kif2B<br>(EcoRI/NotI)    | 5'-TATAGAATTCATGGCCAGCCAGTTC-3'<br>5'-TATAGCGGCCGCTCACTCTACCTTGCTC-3'         | This work                 |
| pcDNA3.1-Flag                          |                                   |                                                                               | 24                        |
| pcDNA3.1-Flag-Fbxw5                    |                                   |                                                                               | 24                        |
| pcDNA3.1-Flag-Fbxw5-ΔF-box             |                                   |                                                                               | 24                        |
| pCMV-3xFLAG-Fbxw7                      |                                   |                                                                               | I. Hoffmann <sup>77</sup> |
| pET28a-His-MCAK                        | pcDNA3.1-HA-MCAK<br>(BamHI/NotI)  | 5'-ATATGGATCCATGGCCATGGACTCGTCG-3'<br>5'-TATAGCGGCCGCCTACTGGGGCCGTTTCTTG-3'   | This work                 |
| pET28a-His-Kif2A                       | pcDNA3.1-HA-Kif2A<br>(BamHI/NotI) | Cloned by restriction digestion                                               | This work                 |
| pET28a-His-Kif2B                       | pcDNA3.1-HA-Kif2B                 | Cloned by restriction digestion                                               | This work                 |

|                                      |                                                                                                              |                                                                                                                                                                                                                                                                                            |            |
|--------------------------------------|--------------------------------------------------------------------------------------------------------------|--------------------------------------------------------------------------------------------------------------------------------------------------------------------------------------------------------------------------------------------------------------------------------------------|------------|
|                                      | (EcoRI/NotI)                                                                                                 |                                                                                                                                                                                                                                                                                            |            |
| pFastBacHT-B-His-Fbxw5               |                                                                                                              |                                                                                                                                                                                                                                                                                            | 24         |
| pFastBac1-Skp1 $\Delta\Delta$        |                                                                                                              |                                                                                                                                                                                                                                                                                            | 24,43      |
| pFastBacHT-B-Eps8                    | pCDNA3.1-HA-Eps8 <sup>24</sup>                                                                               | 5'-GTATTTTCAGGGCGCCATGGATGAATGGTCATATTTCTAATCATC-3'<br>5'-CAGGCTCTAGATTCGAAAGCTTAGTGACTGCTTCCTTC-3'                                                                                                                                                                                        | This work  |
| pFastBacHT-B-MCAK                    | pcDNA3.1-HA-MCAK<br>(BamHI/NotI)                                                                             | 5'-ATATGGATCCATGGCCATGGACTCGTCG-3'<br>5'-TATAGCGGCCGCCTACTGGGGCCGTTTCTTG-3'                                                                                                                                                                                                                | This work  |
| pFastBacHT-B-His-Kif2A               | pcDNA3.1-HA-Kif2A<br>(BamHI/NotI)                                                                            | Cloned by restriction digestion                                                                                                                                                                                                                                                            | This work  |
| pEGFP-PLK1-T210D                     |                                                                                                              |                                                                                                                                                                                                                                                                                            | S. Lev     |
| pFastBacHT-B-His-Plk1-T210D          | pEGFP-PLK1-T210D<br>(Gibson)                                                                                 | 5'-AACCTGTATTTTCAGGGCGCAATGAGTGCTGCAGTGACTG-3'<br>5'-CAGGCTCTAGATTCGAAAGCTTAGGAGGCCTTGAGACG-3'                                                                                                                                                                                             | This work  |
| pcDNA3.1-Flag-Fbxl2                  |                                                                                                              |                                                                                                                                                                                                                                                                                            | L. Hengst  |
| pFastBacHT-B-His-Fbxl2               | pcDNA3.1-Flag-Fbxl2                                                                                          | 5'-GTATTTTCAGGGCGCCATGGTTTTCTCAAACAATGATGAAGG-3'<br>5'-CTCTAGATTCGAAAGCGGCCTCAGAGAATGACACAGCAC-3'                                                                                                                                                                                          | This work  |
| pFastBacHT-B-His-Fbxw7               | pCMV-3xFLAG-Fbxw7                                                                                            |                                                                                                                                                                                                                                                                                            | This work  |
| pET11D-hRanGAP                       |                                                                                                              |                                                                                                                                                                                                                                                                                            | A. Flotho  |
| pBIG1B-His-Cul4A/His-DDB1/His-mmRbx1 |                                                                                                              |                                                                                                                                                                                                                                                                                            | E. Fischer |
| pBIG1B-His-Cul4A/His-DDB1/mmRbx1     | pBigBac-His-Cul4A/His-DDB1/His-mmRbx1<br>(Gibson, 4 fragments)                                               | 5'-ATCTACCATGGGCACCAACAGC-3'<br>5'-TGA CTGCTGCGCTCGGTCGTTCTGGCTGCGGCGAGCGG-3'<br>5'-CGACCGAGCGCAGCGAGT-3'<br>5'-ATGGGCTTGTAGGCGAGCAG-3'<br>5'-TGCTCGCCTACAAGCCCATGG-3'<br>5'-GTCCGGGGGTACCTCATCAGGCCACGTAGTGGTAC-3'<br>5'-CTGATGAGGTACCCCGGAC-3'<br>5'-TGTTGGTGCCCATGGTAGATCCGTATTTATAG-3' | This work  |
| pBIG1B-HisCul1/mmRbx1                | cDNA of RPE-1<br>(Gibson)<br>destination vector:<br>pBigBac-His-Cul4A/His-DDB1/mmRbx1 cut with<br>Sall/PvuII | 5'-CCATCATCATCATCATCACTCCGCGGTCGACGAGAACCCTCTACTTC<br>CAGGGAGGCGGCCGCTCGTCAACCCGGAGCCAG-3'<br>5'-GGCTTTACTGGAAATTTAGTTAAGCCAAGTAACTGTAGGTGTCC-3'                                                                                                                                           | This work  |
| pRetroX-TRE3G-mNG-MCAK               |                                                                                                              |                                                                                                                                                                                                                                                                                            | S. Hata    |

|                             |                                                                                                                                                          |                                                                                                 |           |
|-----------------------------|----------------------------------------------------------------------------------------------------------------------------------------------------------|-------------------------------------------------------------------------------------------------|-----------|
| pRetroX-TRE3G-mNG-Fbxw5     | mNG tag from pRetroX-TRE3G-mNG-MCAK via Gibson into pcDNA3.1-Flag-Fbxw5 cut with HindIII and BamHI. mNG-Fbxw5 then subcloned via BamHI/NotI into pRetroX | 5'-ACTCACTATAGGGAGACCCAATGGTGAGCAAGGGCGAGG-3'<br>5'-GCGTGCCGCCCTCGTCCATGCCGCCTGCACCAGCTCCT-3'   | This work |
| pRetroX-TRE3G-mNG-Kif2B     | pcDNA3.1-HA-Kif2B (Gibson) destination vector: pRetro-TRE3G-mNG-MCAK cut with EcoRI/NotI                                                                 | 5'-GTGCAGGAGCTGGTGAGGCATGGCCAGCCAGTTCTGC-3'<br>5'-GCGCCTCCCCTACCCGGTAGTCACTCTACCTTGCTCTTCACG-3' | This work |
| pQCXIZ-H2B-mRuby2           |                                                                                                                                                          |                                                                                                 | S. Hata   |
| pRetroX-Tet3G               |                                                                                                                                                          |                                                                                                 | Clontech® |
| pVSV-G                      |                                                                                                                                                          |                                                                                                 | Clontech® |
| p53-HaloTag® Fusion Vector  |                                                                                                                                                          |                                                                                                 | Promega   |
| NanoLuc®-MDM2 Fusion Vector |                                                                                                                                                          |                                                                                                 | Promega   |
| pFN21A-HT-Fbxw5             |                                                                                                                                                          |                                                                                                 | Promega   |
| pFC32K-MCAK-NLuc            | pcDNA3.1-HA-MCAK                                                                                                                                         | 5'-GCGTGCGATCGCCATGGCCATGGACTCGTCGCT-3'<br>5'-GGCGGTTTAAACCTGGGGCCGTTTCTTGCTGCT-3'              | This work |
| pFN31K-NLuc-MCAK            | pcDNA3.1-HA-MCAK                                                                                                                                         | 5'-GCGTGCGATCGCCATGGCCATGGACTCGTCGCT-3'<br>5'-GGCGGTTTAAACCTGGGGCCGTTTCTTGCTGCT-3'              | This work |

**Appendix Table S2: Reagents**

| <b>Antibodies</b>                                            |                |                           |                   |
|--------------------------------------------------------------|----------------|---------------------------|-------------------|
| <b>Antibody</b>                                              | <b>Species</b> | <b>Source</b>             | <b>Identifier</b> |
| Monoclonal anti HA.11                                        | Mouse          | Covance                   | MMS-101R          |
| Monoclonal anti-Flag                                         | Mouse          | Sigma Aldrich             | F1804             |
| Monoclonal anti-Flag                                         | Rabbit         | Sigma Aldrich             | F7425             |
| Monoclonal FK2 (ubiquitin)                                   | Mouse          | Enzo Life Sciences        | BWL-PW8810        |
| Monoclonal anti-Eps8                                         | Mouse          | BD Bioscience             | 610144            |
| Monoclonal anti-γ-Tubulin                                    | Mouse          | Sigma Aldrich             | T6557             |
| Monoclonal anti-HGS                                          | Rabbit         | Cell Signaling Technology | 15087             |
| Monoclonal anti-GSTP1                                        | Mouse          | Cell Signaling Technology | 3369              |
| Monoclonal anti-β-actin                                      | Mouse          | Sigma Aldrich             | A1978             |
| Monoclonal anti-Plk1                                         | Rabbit         | Cell Signaling Technology | 4513              |
| Monoclonal anti-CyclinB1                                     | Mouse          | Santa Cruz                | sc-245            |
| Polyclonal anti-Arl13b                                       | Rabbit         | Proteintech               | 17711-1-AP        |
| Polyclonal anti-CSRP2                                        | Rabbit         | Proteintech               | 10892-2-AP        |
| Polyclonal anti-Sec23b                                       | Rabbit         | Sigma Aldrich             | HPA008216         |
| Polyclonal anti-ODF2                                         | Rabbit         | Proteintech               | 12058-1-AP        |
| Polyclonal anti-Fbxw5                                        | Rabbit         | <sup>24</sup>             | n/a               |
| Polyclonal anti-RanGAP1                                      | Goat           | <sup>78</sup>             | n/a               |
| Polyclonal anti-Uba2                                         | Goat           | <sup>79</sup>             | n/a               |
| Anti-Kif2c                                                   | Mouse          | Santa Cruz                | sc-81305          |
| Anti-Kif2c*                                                  | Rabbit         | Novus Biologicals         | NB100-2588        |
| Anti-Kif2a                                                   | Rabbit         | Abnova                    | PAB-12407         |
| Anti-Kif2b                                                   | Rabbit         | Sigma Aldrich             | HPA024795         |
| Anti-Mouse-488                                               | Donkey         | Invitrogen                | A21202            |
| Anti-Mouse-594                                               | Donkey         | Invitrogen                | A21203            |
| Anti-Rabbit-488                                              | Donkey         | Invitrogen                | A21206            |
| Anti-Rabbit-594                                              | Donkey         | Invitrogen                | A21207            |
| <b>Chemicals, reagents, enzymes &amp; Media</b>              |                |                           |                   |
| <b>Name</b>                                                  |                | <b>Source</b>             | <b>Identifier</b> |
| 0.45 μm pore size polyvinylidene difluoride membranes (PVDF) |                | Amersham                  | 10600021/10600023 |
| aprotinin                                                    |                | Roth                      | A162.3            |

|                                                  |                                              |                |
|--------------------------------------------------|----------------------------------------------|----------------|
| ATP                                              | Sigma Aldrich                                | n/a            |
| Cellfectin-II                                    | Invitrogen (Thermo Fisher Scientific)        | 10362100       |
| DMEM                                             | Gibco (Thermo Fisher Scientific)             | 41965-039      |
| DMEM Glutamax™                                   | Gibco (Thermo Fisher Scientific)             | 10566016       |
| DMEM-F12                                         | Gibco (Thermo Fisher Scientific)             | 21331-020      |
| Doxycyclin                                       | Sigma Aldrich                                | 24390-14-5     |
| DYKDDDDK                                         | Pantecs                                      | N/A            |
| Energy regeneration system                       | Boston Biochem                               | B-10           |
| ExCell® 420 Serum-Free Medium                    | Sigma Aldrich                                | 14420C         |
| ExCell® 420 Serum-Free Medium                    | Sigma Aldrich                                | 14420C         |
| Fetal Bovine Serum (FBS), Qualified              | Gibco (Thermo Fisher Scientific)             | 10270-106      |
| Fluorescence mounting medium                     | Dako                                         | S3023          |
| HA-peptide (YPYDVPDYA)                           | Pepscan Therapeutics or Peptides & Elephants | N/A            |
| HiFi assembly mix                                | New England Biolabs                          | E2621          |
| Hoechst 33342                                    | Sigma Aldrich                                | 23491-52-3     |
| Human ProtoArray® Microarray (v5.0)              | ThermoFischer Scientific/Invitrogen          | PAH0525101     |
| Hydroxyurea                                      | Sigma Aldrich                                | 127-07-1       |
| Immobilon Western chemiluminescent HRP substrate | Merck Millipore                              | WBKLS0500      |
| L-Glutamine 200 mM                               | Gibco (Thermo Fisher Scientific)             | 25030-024      |
| Leupeptin Hemisulfat                             | Roth                                         | CN33.4         |
| Lipofectamin RNAi MAX                            | Invitrogen (Thermo Fisher Scientific)        | 13778150       |
| Monoclonal anti-Flag-agarose                     | Sigma Aldrich                                | A2220          |
| Monoclonal anti-HA-agarose                       | Sigma Aldrich                                | A2095          |
| Ni-NTA-Agarose                                   | Qiagen                                       | 30250          |
| Nocodazole                                       | Sigma Aldrich                                | 31430-18-9     |
| OptiMEM                                          | Gibco (Thermo Fisher Scientific)             | 31985-047      |
| PefaBloc® SC                                     | Roche                                        | 11 585 916 001 |
| PepstatinA                                       | Roth                                         | 2936.3         |
| Polyethyleneimide (PEI)                          | PolySciences                                 | 23966          |
| Protein A agarose                                | Roche                                        | 11 134 515 001 |
| Protino Glutathione Agarose 4B                   | Machery & Nagel                              | 745500         |
| Q5 Polymerase                                    | New England Biolabs                          | M0491          |
| Rabbit IgG isotype control                       | ThermoFischer Scientific/Invitrogen          | 10500C         |

| Restriction enzymes                                                                                         | New England Biolabs                 | -                          |                        |
|-------------------------------------------------------------------------------------------------------------|-------------------------------------|----------------------------|------------------------|
| RO-3306                                                                                                     | Sigma Aldrich                       | SLM0569                    |                        |
| Rotiphorese® 30                                                                                             | Roth                                | 3029.1                     |                        |
| Sf-900™ II SFM medium                                                                                       | Gibco (Thermo Fisher Scientific)    | 10902096                   |                        |
| Sf-900™ II SFM medium                                                                                       | Gibco (Thermo Fisher Scientific)    | # 10902096                 |                        |
| Synthetic Block (10x)                                                                                       | ThermoFischer Scientific/Invitrogen | PA017                      |                        |
| TEMED                                                                                                       | Roth                                | 2367.3                     |                        |
| Thymidine                                                                                                   | Sigma Aldrich                       | T9250-1G                   |                        |
| β-mercaptoethanol                                                                                           | Applichem                           | A1108,0025                 |                        |
| <b>E. coli strains</b>                                                                                      |                                     |                            |                        |
| DH5α: F-φ80lacZ ΔM15 (lacZYA-argF) U169 deoR recA1 endA1 hsdR7 (rk-, mk+) phoA supE44 thi-1 gyrA96 relA1 λ- |                                     |                            |                        |
| Rosetta: F- ompT hsdSB (rB- mB-) gal dcm (DE3) pRARE (CmR)                                                  |                                     |                            |                        |
| <b>Recombinant proteins (expressed and purified from E.coli)</b>                                            |                                     |                            |                        |
| Name                                                                                                        | Tag                                 | Expression plasmid         | Source                 |
| APPBP1-Uba3                                                                                                 | Cleaved                             | pGEX-GST-APPBP1-rbs-Uba3   | This work              |
| Cdc34                                                                                                       | Cleaved                             | pGEX6P3-GST-Cdc34          | This work              |
| Kif2a                                                                                                       | 6xHis                               | pET28a-His-Kif2A           | This work              |
| Kif2b                                                                                                       | 6xHis                               | pET28a-His-Kif2B           | This work              |
| MCAK                                                                                                        | 6xHis                               | pET28a-His-MCAK            | This work              |
| Nedd8                                                                                                       | Cleaved                             | pGEX-GST-Nedd8             | This work              |
| Uba1                                                                                                        | 6xHis                               | pET22B-Uba1-His            | This work              |
| Ubc12                                                                                                       | Cleaved                             | pGEX-GST-Ubc12             | This work              |
| UbcH5b                                                                                                      | Cleaved                             | pGEX6P3-GST-UbcH5b         | This work              |
| UbcH5c                                                                                                      | Cleaved                             | pGEX6P3-GST-UbcH5c         | This work              |
| Ube2G1                                                                                                      | Cleaved                             | pGEX6P3-GST-Ube2G1         | This work              |
| Ubiquitin                                                                                                   | 6xHis                               | pET28a-His-Ubiquitin       | This work              |
| Ubiquitin                                                                                                   | -                                   | pET3a-Ubiquitin            | This work              |
| Ubiquitin (K48R)                                                                                            | -                                   | pET3a-Ubiquitin(K48R)      | This work              |
| Ubiquitin (K48R/K63R)                                                                                       | -                                   | pET3a-Ubiquitin(K48R/K63R) | This work              |
| Ubiquitin (K63R)                                                                                            | -                                   | pET3a-Ubiquitin(K63R)      | This work              |
| Ubiquitin (methylated)                                                                                      | -                                   | -                          | Boston Biochem (U-501) |
| Ubiquitin (FITC-labelled)                                                                                   |                                     | Thermo Fisher Scientific   | PV4378                 |
| Cul1A-Cul1B/Rbx1                                                                                            |                                     | -                          | B. Schulmann           |
| TEV(tobacco etch virus) protease                                                                            | 6xHis                               | His-TEV                    | This work              |

|                                                                      |                                 |                                            |                  |
|----------------------------------------------------------------------|---------------------------------|--------------------------------------------|------------------|
| Prescission protease                                                 | GST                             | pGEX-4T-GST-PreScission                    | This work        |
| <b>Recombinant proteins (expressed and purified from Sf21 cells)</b> |                                 |                                            |                  |
| <b>Name</b>                                                          | <b>Tag</b>                      | <b>Expression plasmid</b>                  | <b>Source</b>    |
| Cul1/Rbx1 complex                                                    | TEV cleaved                     | pBIG1B-HisCul1/mmRbx1                      | This work        |
| Cul4A/DDB1/Rbx1 complex                                              | TEV cleaved                     | pBIG1B-His-Cul4A/His-DDB1/His-mmRbx1       | This work        |
| Eps8                                                                 | 6xHis                           | pFastBacHT-B-Eps8                          | This work        |
| Fbxl2/Skp1ΔΔ subcomplex                                              | 6xHis                           | pFastBacHT-B-His-Fbxl2<br>pFastBac1-Skp1ΔΔ | This work        |
| Fbxw5/Skp1ΔΔ subcomplex                                              | 6xHis                           | pFastBacHT-B-His-Fbxw5<br>pFastBac1-Skp1ΔΔ | This work        |
| Fbxw7/Skp1ΔΔ subcomplex                                              | 6xHis                           | pFastBacHT-B-His-Fbxw7<br>pFastBac1-Skp1ΔΔ | This work        |
| Kif2a                                                                | TEV cleaved                     | pFastBacHT-B-His-Kif2A                     | This work        |
| MCAK                                                                 | TEV cleaved                     | pFastBacHT-B-MCAK                          | This work        |
| Plk1-T210D                                                           | 6xHis                           | pFastBacHT-B-His-Plk1-T210D                | This work        |
| <b>siRNAs</b>                                                        |                                 |                                            |                  |
| <b>Target</b>                                                        | <b>Sequence</b>                 | <b>Source</b>                              | <b>Reference</b> |
| non-targeting (NT)                                                   | 5'-UAGCGACUAAACACAUCAAUUdTdT-3' | Ambion/Qiagen                              | 24               |
| Fbxw5#1                                                              | 5'-CCACAGGCGCCAAGAGCAAdTdT-3'   | Ambion / Sigma Aldrich                     | 24               |
| Fbxw5#2                                                              | 5'-CGGGAGAGGUGGAGAUGCdTdT-3'    | Ambion                                     | 24               |
| Fbxw5#3                                                              | 5'-CCCUACAACUGGAGCUACAdTdT-3'   | Dharmacon / Sigma Aldrich                  | 24               |
| MCAK                                                                 | 5'-GAUCCAACGCAGUAAUGGUdTdT-3'   | Sigma Aldrich                              | 61               |
| Kif2a                                                                | 5'-GGAAUGGCAUCCUGUGAAA-3'       | Sigma Aldrich                              | 83               |
| Kif2b                                                                | 5'-GGACCUGGAUAUCAUACC-3'        | Sigma Aldrich                              | 49               |

\* MCAK antibody NB100-2588 was used for Figure 6B, Figure 7B, EV3A, EV4A,B and F. For all other western blots and all IF images, MCAK antibody sc-81305 was used.
